# Supplementary material for: Bioinformatics analysis of the role of aldolase A in tumor prognosis and immunity
Source: Springer Nature journal article supplement (doi:10.1038/s41598-022-15866-4), 2022-07-08
Supplement: MOESM1 [file 41598_2022_15866_MOESM1_ESM.pdf]

## **Supplementary Information for**

Bioinformatics analysis of the role of aldolase A in tumor prognosis and immunity

Wanjia Tian<sup>1,2</sup>, Junying Zhou<sup>1</sup>, Mengyu Chen<sup>1</sup>, Luojie Qiu<sup>1</sup>, Yike Li<sup>3</sup>, Weiwei Zhang<sup>1</sup>,  
Ruixia Guo<sup>1</sup>, Ningjing Lei<sup>3\*</sup>, and Lei Chang<sup>1\*</sup>

<sup>1</sup> Department of Obstetrics and Gynecology, The First Affiliated Hospital of Zhengzhou University, Zhengzhou University, Zhengzhou 450000, Henan, China.

<sup>2</sup> Academy of Medical Sciences of Zhengzhou University, Zhengzhou University, Zhengzhou 450000, Henan, China.

<sup>3</sup> School of Basic Medical Sciences, Zhengzhou University, Zhengzhou 450000, Henan, China.

\* Corresponding author:

Lei Chang (fccchangl@zzu.edu.cn)

Department of Obstetrics and Gynecology, The First Affiliated Hospital of Zhengzhou University, Zhengzhou, Henan 450000, China;

Ningjing Lei (lnj717@zzu.edu.cn)

School of Basic Medical Sciences, Zhengzhou University, Zhengzhou 450000, Henan, China.

**This PDF file includes:**

Supplementary Figure 1, Supplementary Figure 2, Supplementary Figure 3, Supplementary Figure 4, Supplementary Table 1, Supplementary Table 2.

**Supplementary Figure 1: The Proportional Hazards assumption of a Cox Regression in GEO dataset is tested by Schoenfeld residuals.** Schoenfeld residuals test  $p$  value in (A) OS in brain cancer cohort GSE16581. (B) OS in skin cancer cohort GSE19234. (C, D) OS and RFS in lung adenocarcinoma cohort GSE31210. (E) OS in breast cancer cohort GSE9893. (F) DMFS in breast cancer cohort GSE2990. (G, H) DSS and RFS in breast cancer cohort GSE1456-GPL96.

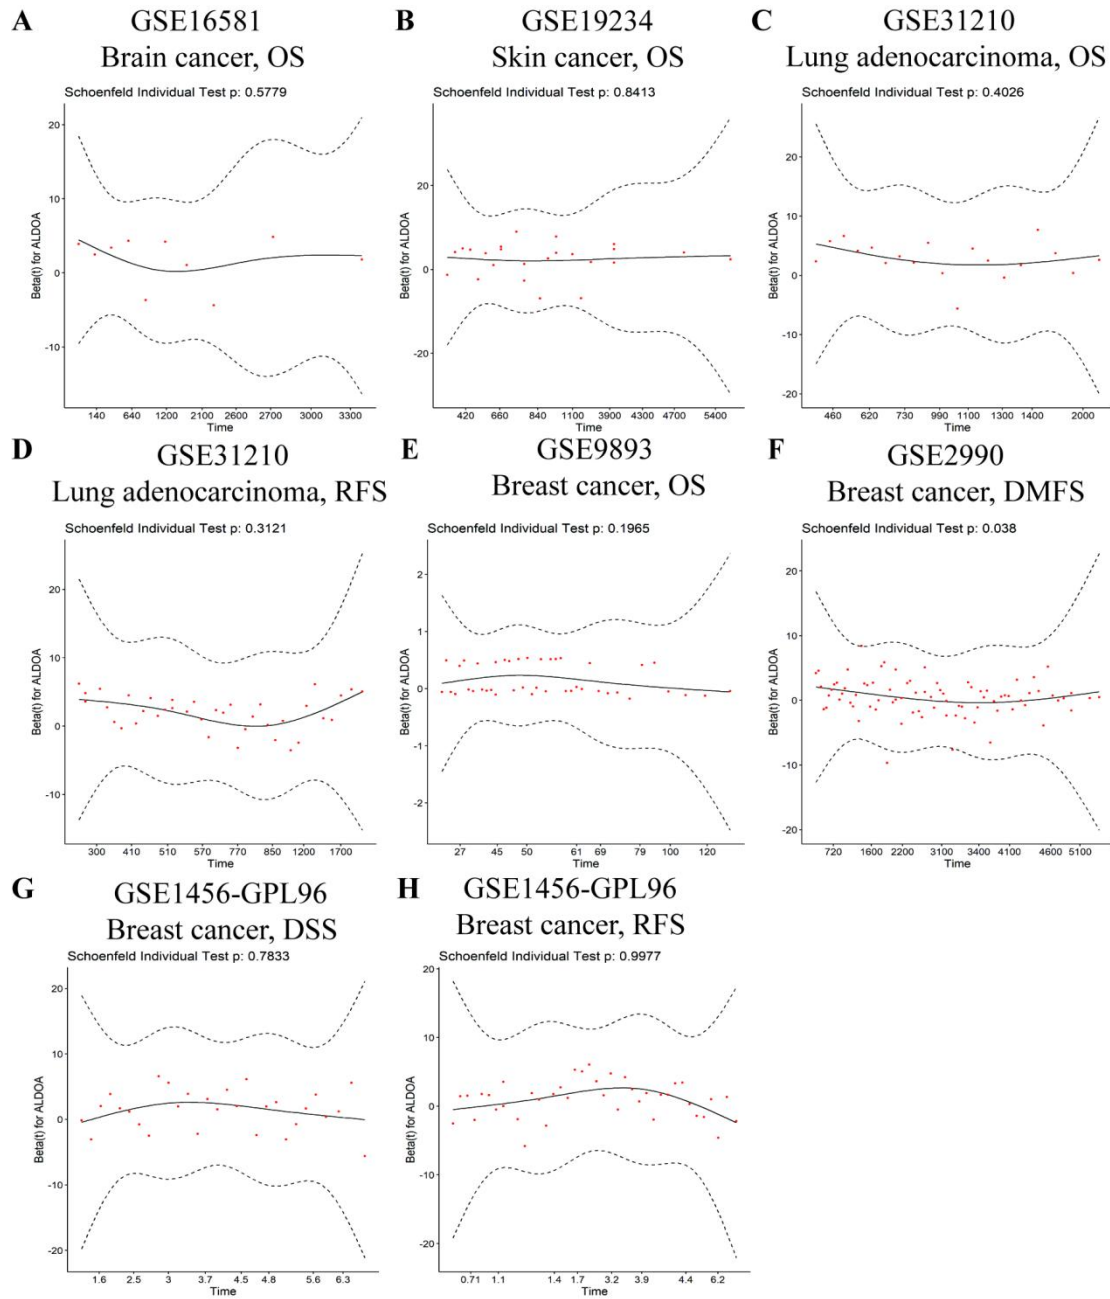

**Supplementary Figure 2: The Proportional Hazards assumption of a Cox Regression in TCGA dataset is tested by Schoenfeld residuals.** Schoenfeld residuals test  $p$  value in OS and RFS of (A, B) lung adenocarcinoma (LUAD) (C, D) cervical squamous cell carcinoma and endocervical adenocarcinoma (CESC) (E, F) thyroid carcinoma (THCA) (G, H) pancreatic ductal adenocarcinoma (PDAC) (I, J) head and neck squamous cell carcinoma (HNSC) (K, L) liver hepatocellular carcinoma (LIHC) (M, N) ovarian cancer (OC), and (O, P) kidney renal clear cell carcinoma (KIRC).

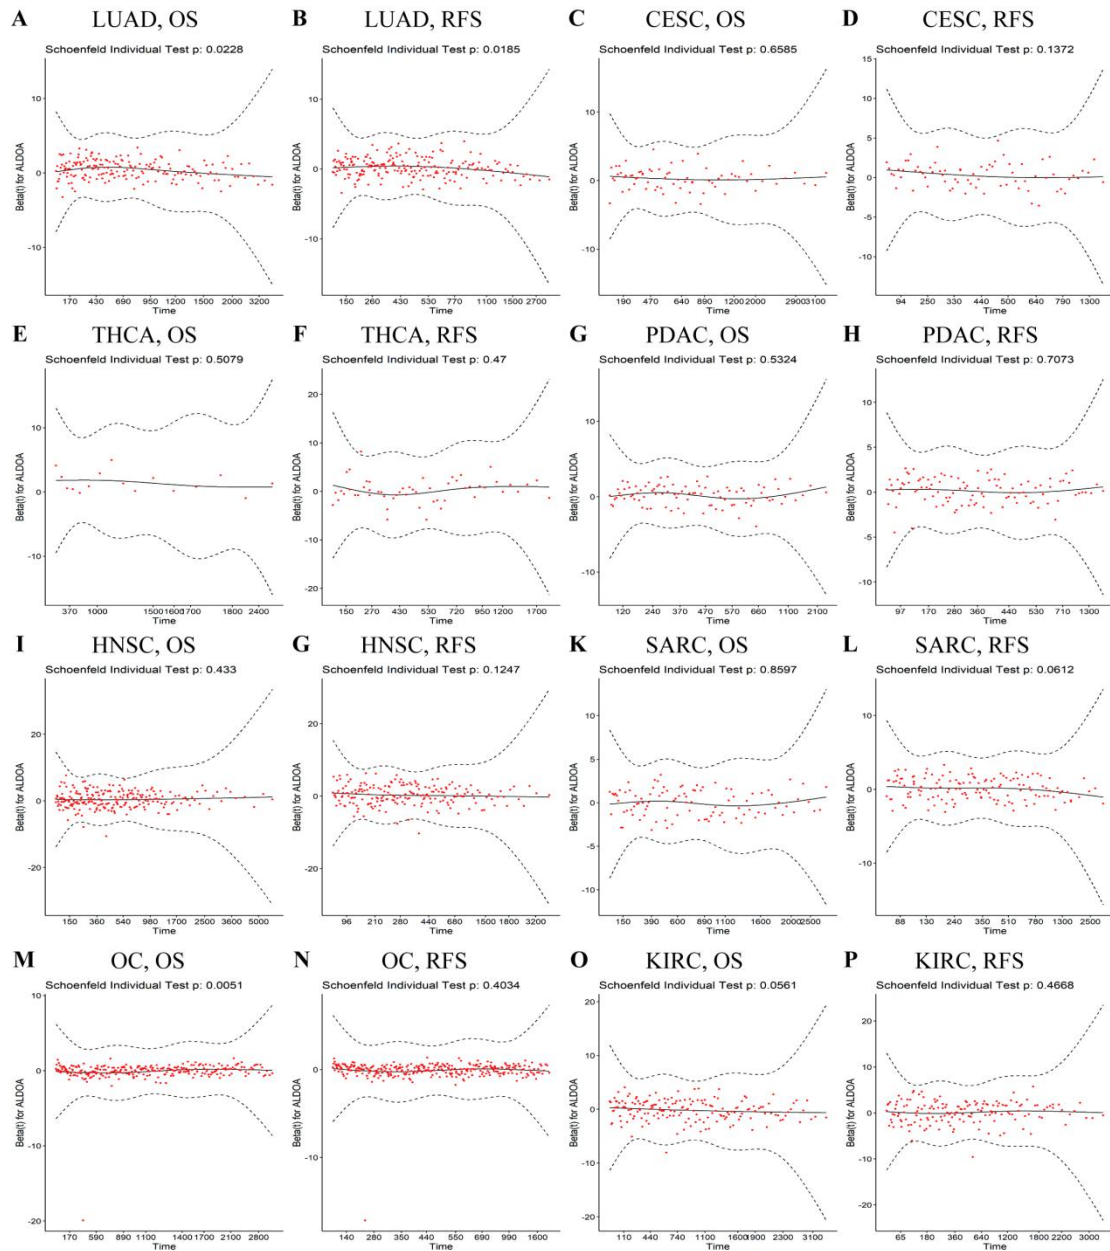

**Supplementary Figure 3: Use GEPIA2 to collect the RNA sequencing data of ALDOA in TCGA, and analyze its influence on the prognosis of different tumors.** Overall survival and disease free survival of (A) all cancer types (B) BLCA, Bladder Urothelial Carcinoma (C) CHOL, Cholangio carcinoma (D) GBM, Glioblastoma multiforme (E) LUSC, Lung squamous cell carcinoma (F) LUAD, Lung adenocarcinoma (G) LIHC, Liver hepatocellular carcinoma (H) TGCT, Testicular Germ Cell Tumors (I) CESC, Cervical squamous cell carcinoma and endocervical adenocarcinoma (J) SKCM, Skin Cutaneous Melanoma (K) LAML, Acute Myeloid Leukemia (L) THCA, Thyroid carcinoma (M) MESO, Mesothelioma (N) COAD, Colon adenocarcinoma (O) OC, Ovarian cancer (P) DLBC, Lymphoid Neoplasm Diffuse Large B-cell Lymphoma (Q) LGG, Brain Lower Grade Glioma (R) UVM, Uveal Melanoma (S) PRAD, Prostate adenocarcinoma (T) SARC, Sarcoma (U) BRCA, Breast invasive carcinoma (V) KIRP, Kidney renal papillary cell carcinoma (W) ACC, Adrenocortical carcinoma (X) KIRC, Kidney renal clear cell carcinoma (Y) KICH, Kidney Chromophobe (Z) ESCA, Esophageal carcinoma (AA) PCPG, Pheochromocytoma and Paraganglioma (AB) HNSC, Head and Neck squamous cell carcinoma (AC) STAD, Stomach adenocarcinoma (AD) THYM, Thymoma (AE) PAAD, Pancreatic adenocarcinoma (AF) READ, Rectum adenocarcinoma (AG) UCS, Uterine Carcinosarcoma (AH) UCEC, Uterine Corpus Endometrial Carcinoma.

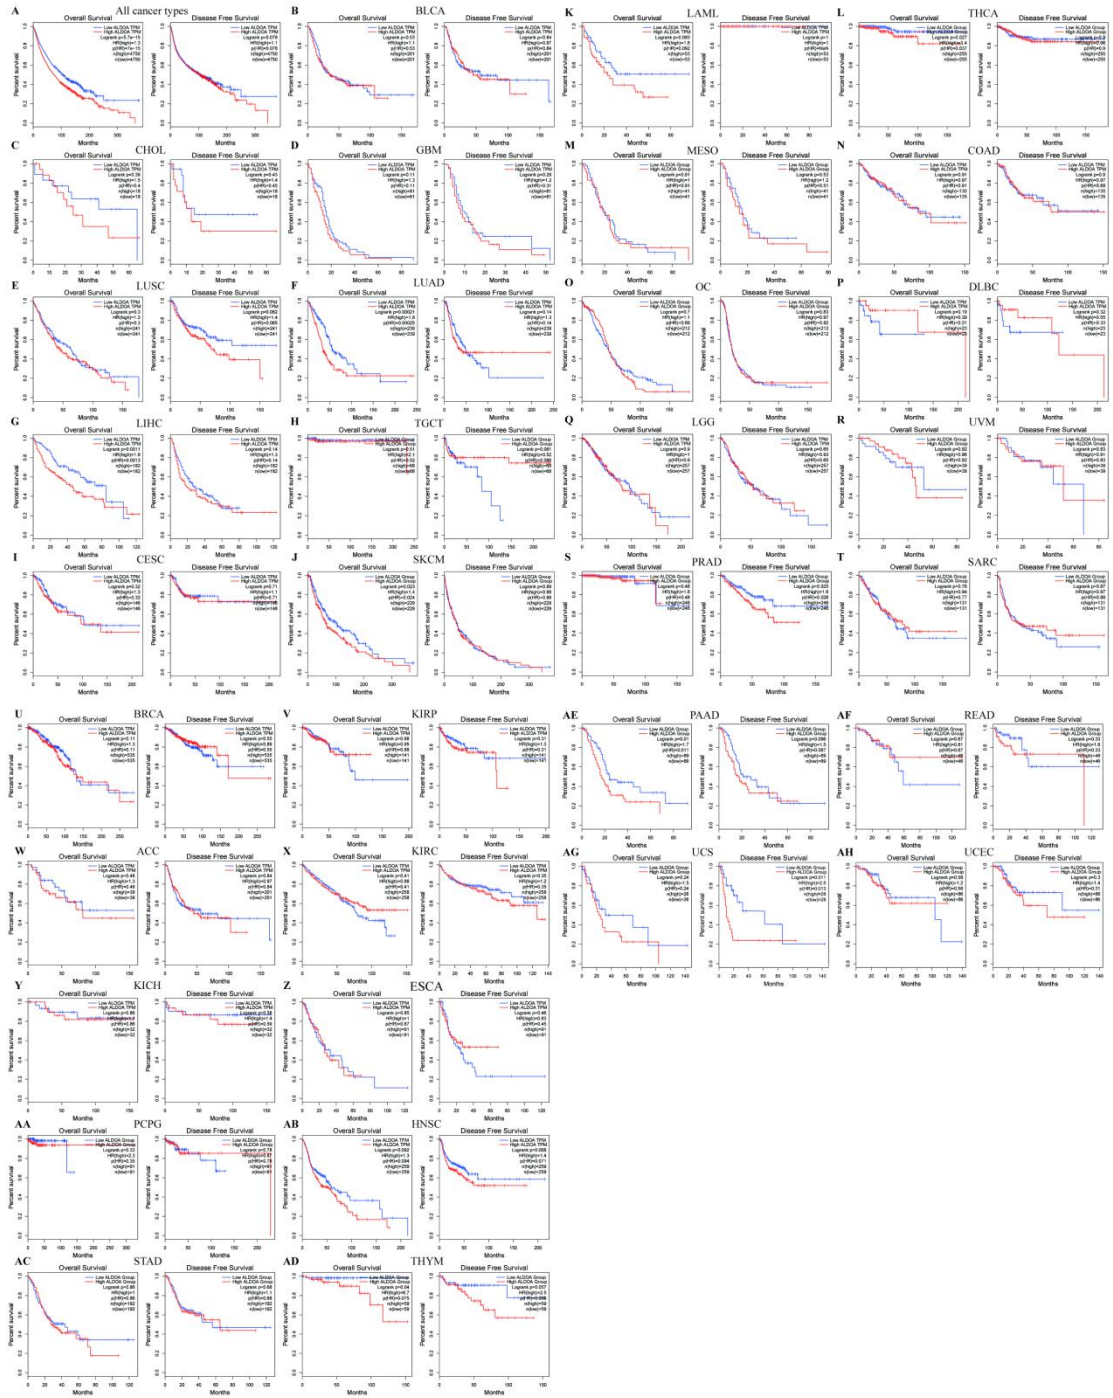

**Supplementary Figure 4: Use Kaplan-Meier Plotter to collect the RNA sequencing data of immune checkpoints in TCGA, and analyze its impact on the prognosis of LIHC and BRCA.**

The influence of (A) BTLA, (B) HHLA2, (C) CD27, (D) ICOS, (E) CD40, (F) ICOSLG, (G) CD40LG, (H) IDO1, (I) CD70, (J) LAFG3, (K) CD274, (L) NCR3, (M) CD276, (N) NT5E, (O) CTLA4, (P) PDCD1, (Q) ENTPD1, (R) PDCD1LG2, (S) FGL1, (T) SIGLEC15, (U) HAVCR2, (V) TMIGD2, (W) TNFRSF4, (X) TNFRSF9, (Y) TNFRSF18, (Z) TNFSF4, (AA) TNFSF9, (AB) TNFSF14, (AC) VSIR, (AD) VTCN1 on the OS and RFS of LIHC and BRCA.

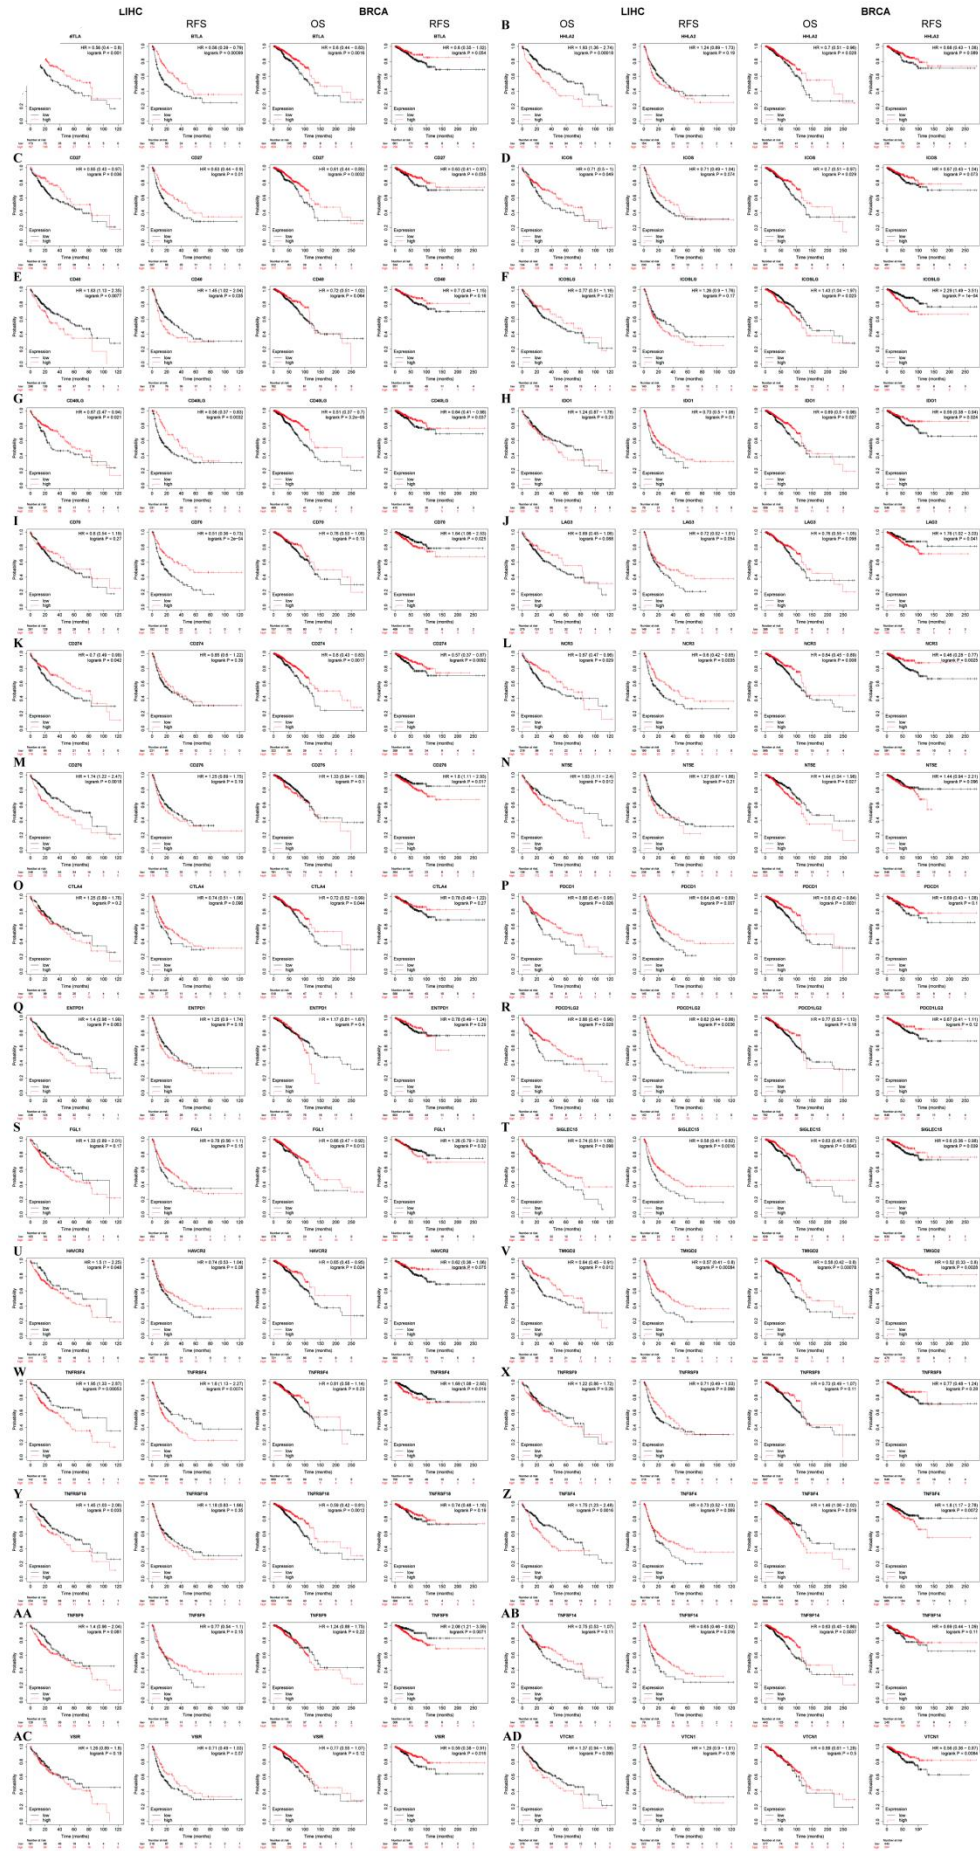

**Supplementary Table 1: Accelerated Failure Time model was applied to further evaluate the association of the outcome and the expression of ALDOA.**

|                                  |       |          |        |         |         |
|----------------------------------|-------|----------|--------|---------|---------|
| GSE2990<br>Breast cancer<br>DMFS | var   | Estimate | StdErr | z.value | p.value |
|                                  | ALDOA | -0.421   | 0.143  | -2.943  | 0.003   |
| LUAD OS                          | var   | Estimate | StdErr | z.value | p.value |
|                                  | ALDOA | -0.399   | 0.123  | -3.249  | 0.001   |
| LUAD RFS                         | var   | Estimate | StdErr | z.value | p.value |
|                                  | ALDOA | -0.235   | 0.092  | -2.561  | 0.01    |
| OC OS                            | var   | Estimate | StdErr | z.value | p.value |
|                                  | ALDOA | 0.027    | 0.054  | 0.499   | 0.618   |

**Supplementary Table 2: Mutual-exclusivity analysis between ALDOA and multiple-immune checkpoints in BRCA, LUAD and SKCM.**

|       | A        | B        | Neither | A Not B | B Not A | Both  | Log2 Odds Ratio | p-Value | q-Value       | Tendency           |
|-------|----------|----------|---------|---------|---------|-------|-----------------|---------|---------------|--------------------|
| BRCA  | ALDOA    | IDO1     | 3895    | 145     | 334     | 37    | 1.573           | <0.001  | <0.001        | Co-occurrence      |
|       | ALDOA    | VSIR     | 4161    | 168     | 68      | 14    | 2.35            | <0.001  | <0.001        | Co-occurrence      |
|       | ALDOA    | TNFSF4   | 3932    | 154     | 297     | 28    | 1.267           | <0.001  | <0.001        | Co-occurrence      |
|       | ALDOA    | NT5E     | 4188    | 177     | 41      | 5     | 1.529           | 0.039   | 0.076         | Co-occurrence      |
|       | ALDOA    | TNFSF9   | 4171    | 176     | 58      | 6     | 1.294           | 0.047   | 0.085         | Co-occurrence      |
|       | ALDOA    | CD276    | 4170    | 176     | 59      | 6     | 1.269           | 0.05    | 0.089         | Co-occurrence      |
|       | ALDOA    | NCR3     | 4182    | 177     | 47      | 5     | 1.33            | 0.062   | 0.106         | Co-occurrence      |
|       | ALDOA    | ENTPD1   | 4208    | 179     | 21      | 3     | 1.748           | 0.074   | 0.124         | Co-occurrence      |
|       | ALDOA    | TNFSF14  | 4162    | 176     | 67      | 6     | 1.083           | 0.079   | 0.131         | Co-occurrence      |
|       | ALDOA    | CD70     | 4161    | 176     | 68      | 6     | 1.061           | 0.083   | 0.136         | Co-occurrence      |
|       | ALDOA    | CD274    | 4136    | 181     | 93      | 1     | -2.025          | 0.094   | 0.149         | Mutual exclusivity |
|       | ALDOA    | PDCD1LG2 | 4138    | 181     | 91      | 1     | -1.993          | 0.1     | 0.158         | Mutual exclusivity |
|       | ALDOA    | TMIGD2   | 4157    | 176     | 72      | 6     | 0.977           | 0.101   | 0.159         | Co-occurrence      |
|       | ALDOA    | TNFRSF9  | 4176    | 182     | 53      | 0     | <-3             | 0.106   | 0.163         | Mutual exclusivity |
|       | ALDOA    | LAG3     | 4119    | 174     | 110     | 8     | 0.784           | 0.113   | 0.172         | Co-occurrence      |
|       | ALDOA    | SIGLEC15 | 4181    | 182     | 48      | 0     | <-3             | 0.131   | 0.198         | Mutual exclusivity |
|       | ALDOA    | CD40LG   | 4194    | 182     | 35      | 0     | <-3             | 0.228   | 0.323         | Mutual exclusivity |
|       | ALDOA    | VTCN1    | 4164    | 178     | 65      | 4     | 0.526           | 0.317   | 0.421         | Co-occurrence      |
|       | ALDOA    | FGL1     | 4062    | 176     | 167     | 6     | -0.27           | 0.423   | 0.525         | Mutual exclusivity |
|       | ALDOA    | ICOSLG   | 4159    | 180     | 70      | 2     | -0.599          | 0.423   | 0.525         | Mutual exclusivity |
| ALDOA | CD40     | 4105     | 176     | 124     | 6       | 0.175 | 0.45            | 0.544   | Co-occurrence |                    |
| ALDOA | TNFRSF18 | 4169     | 179     | 60      | 3       | 0.22  | 0.486           | 0.564   | Co-occurrence |                    |

|       |        |          |      |     |     |       |        |        |                    |                    |
|-------|--------|----------|------|-----|-----|-------|--------|--------|--------------------|--------------------|
|       | ALDOA  | CD27     | 4123 | 177 | 106 | 5     | 0.136  | 0.487  | 0.564              | Co-occurrence      |
|       | ALDOA  | TNFRSF4  | 4167 | 179 | 62  | 3     | 0.172  | 0.507  | 0.58               | Co-occurrence      |
|       | ALDOA  | BTLA     | 4187 | 180 | 42  | 2     | 0.148  | 0.548  | 0.602              | Co-occurrence      |
|       | ALDOA  | HHLA2    | 4172 | 180 | 57  | 2     | -0.298 | 0.558  | 0.61               | Mutual exclusivity |
|       | ALDOA  | CTLA4    | 4184 | 180 | 45  | 2     | 0.047  | 0.584  | 0.624              | Co-occurrence      |
|       | ALDOA  | HAVCR2   | 4196 | 181 | 33  | 1     | -0.509 | 0.587  | 0.627              | Mutual exclusivity |
|       | ALDOA  | PDCD1    | 4178 | 180 | 51  | 2     | -0.136 | 0.625  | 0.649              | Mutual exclusivity |
|       | ALDOA  | ICOS     | 4182 | 180 | 47  | 2     | -0.016 | 0.671  | 0.687              | Mutual exclusivity |
| LUAD  | ALDOA  | TNFSF4   | 1394 | 17  | 74  | 6     | 2.733  | <0.001 | 0.014              | Co-occurrence      |
|       | ALDOA  | VTCN1    | 1434 | 19  | 34  | 4     | >3     | 0.002  | 0.025              | Co-occurrence      |
|       | ALDOA  | NCR3     | 1435 | 20  | 33  | 3     | 2.705  | 0.016  | 0.121              | Co-occurrence      |
|       | ALDOA  | TNFSF14  | 1451 | 21  | 17  | 2     | >3     | 0.033  | 0.206              | Co-occurrence      |
|       | ALDOA  | CD70     | 1457 | 22  | 11  | 1     | 2.59   | 0.171  | 0.61               | Co-occurrence      |
|       | ALDOA  | TNFSF9   | 1455 | 22  | 13  | 1     | 2.347  | 0.196  | 0.648              | Co-occurrence      |
|       | ALDOA  | VSIR     | 1455 | 22  | 13  | 1     | 2.347  | 0.196  | 0.648              | Co-occurrence      |
|       | ALDOA  | FGL1     | 1381 | 23  | 87  | 0     | <-3    | 0.248  | 0.745              | Mutual exclusivity |
|       | ALDOA  | SIGLEC15 | 1443 | 22  | 25  | 1     | 1.392  | 0.335  | 0.846              | Co-occurrence      |
|       | ALDOA  | NT5E     | 1442 | 22  | 26  | 1     | 1.334  | 0.345  | 0.847              | Co-occurrence      |
|       | ALDOA  | TMIGD2   | 1440 | 22  | 28  | 1     | 1.225  | 0.366  | 0.847              | Co-occurrence      |
|       | ALDOA  | CD27     | 1439 | 22  | 29  | 1     | 1.173  | 0.376  | 0.847              | Co-occurrence      |
|       | ALDOA  | LAG3     | 1432 | 22  | 36  | 1     | 0.854  | 0.441  | 0.849              | Co-occurrence      |
|       | ALDOA  | CD40LG   | 1425 | 23  | 43  | 0     | <-3    | 0.508  | 0.849              | Mutual exclusivity |
|       | ALDOA  | PDCD1LG2 | 1420 | 22  | 48  | 1     | 0.427  | 0.539  | 0.849              | Co-occurrence      |
| ALDOA | CD274  | 1417     | 22   | 51  | 1   | 0.337 | 0.561  | 0.849  | Co-occurrence      |                    |
| ALDOA | HAVCR2 | 1432     | 23   | 36  | 0   | <-3   | 0.568  | 0.849  | Mutual exclusivity |                    |

|       |       |          |      |    |    |    |        |        |               |                    |
|-------|-------|----------|------|----|----|----|--------|--------|---------------|--------------------|
|       | ALDOA | TNFRSF4  | 1433 | 23 | 35 | 0  | <-3    | 0.577  | 0.849         | Mutual exclusivity |
|       | ALDOA | IDO1     | 1385 | 22 | 83 | 1  | -0.399 | 0.625  | 0.849         | Mutual exclusivity |
|       | ALDOA | TNFRSF18 | 1439 | 23 | 29 | 0  | <-3    | 0.634  | 0.849         | Mutual exclusivity |
|       | ALDOA | ENTPD1   | 1441 | 23 | 27 | 0  | <-3    | 0.655  | 0.849         | Mutual exclusivity |
|       | ALDOA | TNFRSF9  | 1442 | 23 | 26 | 0  | <-3    | 0.665  | 0.849         | Mutual exclusivity |
|       | ALDOA | PDCD1    | 1446 | 23 | 22 | 0  | <-3    | 0.709  | 0.849         | Mutual exclusivity |
|       | ALDOA | ICOS     | 1448 | 23 | 20 | 0  | <-3    | 0.731  | 0.851         | Mutual exclusivity |
|       | ALDOA | ICOSLG   | 1448 | 23 | 20 | 0  | <-3    | 0.731  | 0.851         | Mutual exclusivity |
|       | ALDOA | CTLA4    | 1449 | 23 | 19 | 0  | <-3    | 0.743  | 0.851         | Mutual exclusivity |
|       | ALDOA | CD40     | 1449 | 23 | 19 | 0  | <-3    | 0.743  | 0.851         | Mutual exclusivity |
|       | ALDOA | CD276    | 1451 | 23 | 17 | 0  | <-3    | 0.767  | 0.851         | Mutual exclusivity |
|       | ALDOA | HHLA2    | 1451 | 23 | 17 | 0  | <-3    | 0.767  | 0.851         | Mutual exclusivity |
|       | ALDOA | BTLA     | 1455 | 23 | 13 | 0  | <-3    | 0.816  | 0.861         | Mutual exclusivity |
| SKCM  | ALDOA | NCR3     | 1453 | 11 | 69 | 9  | >3     | <0.001 | <0.001        | Co-occurrence      |
|       | ALDOA | CD27     | 1494 | 14 | 28 | 6  | >3     | <0.001 | <0.001        | Co-occurrence      |
|       | ALDOA | NT5E     | 1474 | 14 | 48 | 6  | >3     | <0.001 | <0.001        | Co-occurrence      |
|       | ALDOA | CD276    | 1469 | 14 | 53 | 6  | >3     | <0.001 | <0.001        | Co-occurrence      |
|       | ALDOA | CD40LG   | 1510 | 17 | 12 | 3  | >3     | <0.001 | 0.006         | Co-occurrence      |
|       | ALDOA | HHLA2    | 1425 | 14 | 97 | 6  | 2.654  | 0.001  | 0.01          | Co-occurrence      |
|       | ALDOA | ICOSLG   | 1505 | 17 | 17 | 3  | >3     | 0.002  | 0.012         | Co-occurrence      |
|       | ALDOA | TNFRSF4  | 1482 | 16 | 40 | 4  | >3     | 0.002  | 0.012         | Co-occurrence      |
|       | ALDOA | TNFSF4   | 1481 | 16 | 41 | 4  | >3     | 0.002  | 0.013         | Co-occurrence      |
|       | ALDOA | FGL1     | 1481 | 16 | 41 | 4  | >3     | 0.002  | 0.013         | Co-occurrence      |
|       | ALDOA | TNFRSF9  | 1478 | 16 | 44 | 4  | >3     | 0.003  | 0.015         | Co-occurrence      |
| ALDOA | VTCN1 | 1477     | 16   | 45 | 4  | >3 | 0.003  | 0.015  | Co-occurrence |                    |

|       |          |      |    |    |   |       |       |       |                    |
|-------|----------|------|----|----|---|-------|-------|-------|--------------------|
| ALDOA | TNFRSF18 | 1477 | 16 | 45 | 4 | >3    | 0.003 | 0.015 | Co-occurrence      |
| ALDOA | CTLA4    | 1501 | 17 | 21 | 3 | >3    | 0.003 | 0.016 | Co-occurrence      |
| ALDOA | ENTPD1   | 1466 | 16 | 56 | 4 | 2.71  | 0.006 | 0.026 | Co-occurrence      |
| ALDOA | PDCD1    | 1459 | 16 | 63 | 4 | 2.533 | 0.009 | 0.036 | Co-occurrence      |
| ALDOA | TMIGD2   | 1488 | 17 | 34 | 3 | 2.949 | 0.011 | 0.04  | Co-occurrence      |
| ALDOA | SIGLEC15 | 1507 | 18 | 15 | 2 | >3    | 0.019 | 0.059 | Co-occurrence      |
| ALDOA | ICOS     | 1506 | 18 | 16 | 2 | >3    | 0.022 | 0.063 | Co-occurrence      |
| ALDOA | HAVCR2   | 1477 | 17 | 45 | 3 | 2.534 | 0.022 | 0.064 | Co-occurrence      |
| ALDOA | IDO1     | 1436 | 16 | 86 | 4 | 2.062 | 0.026 | 0.071 | Co-occurrence      |
| ALDOA | LAG3     | 1472 | 17 | 50 | 3 | 2.377 | 0.029 | 0.079 | Co-occurrence      |
| ALDOA | CD40     | 1487 | 18 | 35 | 2 | 2.239 | 0.081 | 0.176 | Co-occurrence      |
| ALDOA | CD70     | 1513 | 19 | 9  | 1 | >3    | 0.123 | 0.228 | Co-occurrence      |
| ALDOA | VSIR     | 1472 | 18 | 50 | 2 | 1.71  | 0.144 | 0.261 | Co-occurrence      |
| ALDOA | BTLA     | 1504 | 19 | 18 | 1 | 2.137 | 0.221 | 0.365 | Co-occurrence      |
| ALDOA | TNFSF9   | 1500 | 19 | 22 | 1 | 1.843 | 0.261 | 0.405 | Co-occurrence      |
| ALDOA | TNFSF14  | 1480 | 20 | 42 | 0 | <-3   | 0.574 | 0.668 | Mutual exclusivity |
| ALDOA | PDCD1LG2 | 1491 | 20 | 31 | 0 | <-3   | 0.664 | 0.719 | Mutual exclusivity |
| ALDOA | CD274    | 1495 | 20 | 27 | 0 | <-3   | 0.701 | 0.747 | Mutual exclusivity |
